# Supplementary material for: Pharmacogenomics of Methotrexate Membrane Transport Pathway: Can Clinical Response to Methotrexate in Rheumatoid Arthritis Be Predicted?
Source: Int J Mol Sci. 2015 Jun 16;16(6):13760–80. doi: 10.3390/ijms160613760 (PMC4490522; doi:10.3390/ijms160613760)
Supplement: Supplementary file 1 [file ijms-16-13760-s001.pdf]

# Supplementary Information

**Table S1.** List of the selected polymorphisms for genotyping, reasons for their choice and which were genotyped in this study.

| Protein                                                    | Gene            | rs          | Minor Allele Frequency | Polymorphism Denomination | Polymorphism Localization | Reasons for Choice | Refs.         | Described in PharmGKB? | Additional rs Described in PharmKB for the Gene #?                                | Genotyped in this Study? |
|------------------------------------------------------------|-----------------|-------------|------------------------|---------------------------|---------------------------|--------------------|---------------|------------------------|-----------------------------------------------------------------------------------|--------------------------|
| Monocarboxylate transporter 2                              | <i>SLC16A7</i>  | rs10877333  | 20%                    | 218-T8954G (intron)       | chr12:60156046            | (B,E)              | [34]          | No                     | No                                                                                | Yes                      |
|                                                            |                 | rs2711655   | 40%                    | 361+T1278C (intron)       | chr12:60166421            | (B,E)              | [34]          | No                     |                                                                                   | No *                     |
|                                                            |                 | rs3763980   | 31%                    | A1333T (Thr445Ser)        | chr12:60173356            | (B,C)              | [34]          | Yes                    |                                                                                   | Yes                      |
| Folate transporter 1                                       | <i>SLC19A1</i>  | rs1051266   | 29%                    | G80A (His27Arg)           | chr21:45537880            | (A–C)              | [55,56,82–86] | Yes                    | Yes, only 3 rs were not included due to the proximity of the polymorphisms chosen | Yes                      |
|                                                            |                 | rs1131596   | 43%                    | T-43C (5'UTR)             | chr21:46957916            | (A–C)              | [86,87]       | Yes                    |                                                                                   | No *                     |
|                                                            |                 | rs12659     | 50%                    | 3945997A>G (Pro192Pro)    | chr21:46951556            | (A,E)              | [20]          | Yes                    |                                                                                   | No *                     |
|                                                            |                 | rs188530    | ?                      | 12910392C>T (intron)      | chr21:27248521            | (A)                | [20]          | No                     |                                                                                   | No *                     |
|                                                            |                 | rs2838956   | 39%                    | 1293+T707C (intron)       | chr21:46945024            | (A,B)              | [55,86]       | Yes                    |                                                                                   | Yes                      |
|                                                            |                 | rs3788200   | 42%                    | 3951012A>G (intron)       | chr21:46956571            | (A,E)              | [20]          | Yes                    |                                                                                   | Yes                      |
|                                                            |                 | rs7499      | 37%                    | G*16A (3'UTR)             | chr21:46932328            | (A,B)              | [55]          | Yes                    |                                                                                   | Yes                      |
| Solute carrier family 22 member 6                          | <i>SLC22A6</i>  | rs11568626  | ?                      | G149A (Arg50His )         | chr11:62752014            | (A,C)              | [20,88,89]    | Yes                    | No                                                                                | Yes                      |
| Solute carrier family 22 member 8                          | <i>SLC22A8</i>  | rs139472995 | ?                      | C270T (3'UTR)             | chr11:62760439            | (A)                | [20]          | No                     | No                                                                                | No *                     |
|                                                            |                 | rs45566039  | ?                      | C>A (Arg149Ser)           | chr11:62999835            | (A,C)              | [20,90]       | No                     |                                                                                   | No *                     |
| Solute carrier family 22 member 11                         | <i>SLC22A11</i> | rs11231809  | 42%                    | T9608745A (intron)        | chr11:64302950            | (A,C)              | [20,42]       | Yes                    | No                                                                                | Yes                      |
| Proton-coupled folate transporter                          | <i>SLC46A1</i>  | rs2239907   | 47%                    | A*928G (3'UTR)            | chr17:26725744            | (A,B)              | [20,35,85]    | No                     | No                                                                                | Yes                      |
| Solute carrier organic anion transporter family member 1B1 | <i>SLCO1B1</i>  | rs11045879  | 16%                    | 1865+T4846C (intron)      | chr12:21382619            | (A,C)              | [20,91]       | Yes                    | Yes, only 3 rs were not included due to the proximity of the polymorphisms chosen | No *                     |
|                                                            |                 | rs2306283   | 23%                    | A388G (Asn130Asp)         | chr12:21176804            | (A–C)              | [5,85, 92,93] | Yes                    |                                                                                   | No *                     |
|                                                            |                 | rs4149056   | 15%                    | T521C (Val173Ala)         | chr12:21331549            | (A–C)              | [85,91,94]    | Yes                    |                                                                                   | Yes                      |
|                                                            |                 | rs56387224  | ?                      | A388G (Asn432Asp)         | chr12:21355583            | (A,C)              | [95]          | No                     |                                                                                   | No *                     |

Table S1. *Cont.*

| Protein                                   | Gene         | rs         | Minor Allele Frequency | Polymorphism Denomination | Polymorphism Localization | Reasons for Choice | Refs                      | Described in PharmGKB? | Additional rs Described in PharmKB for the Gene #? | Genotyped in this Study? |
|-------------------------------------------|--------------|------------|------------------------|---------------------------|---------------------------|--------------------|---------------------------|------------------------|----------------------------------------------------|--------------------------|
| Folate receptor $\alpha$                  | <i>FOLR1</i> | rs7928531  | ?                      | T-15C (5'UTR)             | chr11:71906694            | (A,D)              | [96]                      | No                     | No                                                 | No *                     |
| Folate receptor $\beta$                   | <i>FOLR2</i> | rs13908    | ?                      | A103G (Lys35Glu)          | chr11:71929731            | (D)                | [96]                      | No                     | No                                                 | No *                     |
| Folate receptor $\gamma$                  | <i>FOLR3</i> | rs7925545  | ?                      | A-1280G (5'UTR)           | chr11:71845541            | (D)                | [96]                      | No                     | No                                                 | No *                     |
|                                           |              | rs7926987  | 4%                     | 169-C504G (intron)        | chr11:71849503            | (D)                | [96]                      | No                     |                                                    | No *                     |
|                                           |              | rs7926875  | 4%                     | 169-C565A (intron)        | chr11:71849442            | (D)                | [96]                      | No                     |                                                    | No *                     |
|                                           |              | rs508088   | ?                      | 17156451C>T (Leu174Profs) | chr11:71850656            | (D)                | [96]                      | No                     |                                                    | No *                     |
|                                           |              | rs34970007 | ?                      | G594A (Lys198Lys)         | chr11:71850731            | (D)                | [96]                      | No                     |                                                    | No *                     |
| Multidrug resistance protein 1            | <i>ABCB1</i> | rs1045642  | 44%                    | C3435T (Ile1145Ile)       | chr7:87138645             | (A–C)              | [45,57,64,65,84,85,97,98] | Yes                    | No                                                 | Yes                      |
|                                           |              | rs1128503  | 43%                    | C1236T (Gly412Gly)        | chr7:87179601             | (A,B)              | [85]                      | Yes                    |                                                    | Yes                      |
|                                           |              | rs2032582  | 43%                    | G2677A/T (Ala899Ser/Thr)  | chr7:87160618             | (A,B)              | [57,99]                   | Yes                    |                                                    | Yes                      |
|                                           |              | rs4148737  | 16%                    | 2212-A372G (intron)       | chr7:87541836             | (A,E)              | [20]                      | Yes                    |                                                    | No                       |
| Multidrug resistance-associated protein 1 | <i>ABCC1</i> | rs2230671  | 21%                    | G4002A/C                  | chr16:16228242            | (A,E)              | [20]                      | No                     | No                                                 | Yes                      |
|                                           |              | rs2074087  | 16%                    | IVS18-C30G (intrão)       | chr16:16184231            | (A,E)              | [20]                      | No                     |                                                    | Yes                      |
|                                           |              | rs11075291 | 41%                    | 49-G3198A                 | chr16:16098475            | (A,E)              | [20]                      | No                     |                                                    | No *                     |
|                                           |              | rs1967120  | 31%                    | 489+G409A (intrão)        | chr16:16108894            | (A,E)              | [20]                      | No                     |                                                    | No *                     |
|                                           |              | rs2238476  | 6%                     | G1960A (intron)           | chr16:16213872            | (A,B)              | [100]                     | Yes                    |                                                    | No *                     |
|                                           |              | rs28364006 | ?                      | A3664G (Thr1337Ala)       | chr16:16228249            | (A,B)              | [100]                     | Yes                    |                                                    | No *                     |
|                                           |              | rs3784864  | 48%                    | 616-G1641A (intron)       | chr16:16125325            | (A,B)              | [100]                     | No                     |                                                    | Yes                      |
|                                           |              | rs3784862  | 22%                    | 615+G413A (intron)        | chr16:16110891            | (A,E)              | [100]                     | Yes                    |                                                    | No *                     |
|                                           |              | rs246240   | 13%                    | 616-A7942G (intron)       | chr16:16119024            | (A,B)              | [100]                     | Yes                    |                                                    | Yes                      |
|                                           |              | rs35592    | 29%                    | 1219-T176C (intron)       | chr16:16141823            | (A,B)              | [35,98,100]               | Yes                    |                                                    | Yes                      |

Table S1. *Cont.*

| Protein                                               | Gene  | rs         | Minor Allele Frequency | Polymorphism Denomination | Polymorphism Localization | Reasons for Choice | Refs        | Described in PharmGKB? | Additional rs Described in PharmKB for the Gene #? | Genotyped in this Study? |
|-------------------------------------------------------|-------|------------|------------------------|---------------------------|---------------------------|--------------------|-------------|------------------------|----------------------------------------------------|--------------------------|
| Canalicular multispecific organic anion transporter 1 | ABCC2 | rs717620   | 19%                    | C-24T (5'UTR)             | chr10:101542578           | (A–C)              | [35,85,101] | Yes                    | No                                                 | Yes                      |
|                                                       |       | rs8187707  | 5%                     | C4488T (His1496His)       | chr10:101610533           | (A)                | [20]        | Yes                    |                                                    | No *                     |
|                                                       |       | rs2273697  | 22%                    | G1249A (Val417Ile)        | chr10:101563815           | (A–C)              | [85,98,102] | Yes                    |                                                    | No *                     |
|                                                       |       | rs8187710  | 5%                     | G4544A (Cys1515Tyr)       | chr10:101611293           | (A)                | [20]        | Yes                    |                                                    | No *                     |
|                                                       |       | rs4148396  | 34%                    | IVS23+T56C (intron)       | chr10:101591944           | (A,B)              | [35,98]     | Yes                    |                                                    | Yes                      |
|                                                       |       | rs3740066  | 34%                    | C3972T (Ile1324Ile)       | chr10:101604206           | (A,E)              | [20]        | Yes                    |                                                    | No *                     |
| Canalicular multispecific organic anion transporter 2 | ABCC3 | rs4148416  | 3%                     | C3039T (Gly1013Gly)       | chr17:50676062            | (A)                | [20]        | Yes                    | No                                                 | No *                     |
|                                                       |       | rs9895420  | ?                      | T-260A (5'UTR)            | chr17:48712038            | (A)                | [20]        | Yes                    |                                                    | No *                     |
| ATP-binding cassette sub-family G member 2            | ABCG2 | rs2231142  | 10%                    | C421A (Gln141Lys)         | chr4:89052323             | (A–C)              | [71,85,98]  | Yes                    | Yes, only 1 rs was not                             | Yes                      |
|                                                       |       | rs17731538 | 24%                    | 204 –C1592T (intron)      | chr4:89055379             | (A,B)              | [98,100]    | Yes                    | included due to the proximity                      | Yes                      |
|                                                       |       | rs13120400 | 32%                    | 1194+A928G (intron)       | chr4:89033527             | (A,B)              | [100]       | Yes                    | of the polymorphisms chosen                        | Yes                      |

# Additional rs described in PharmKB for the gene that were related to methotrexate; \* Not genotyped due to incompatibilities between SNPs in the same Plex. This problem was a technical limitation of the used Sequenom® MassARRAY iPLEX as genotyping technique; (A) Protein was described as playing a role in methotrexate membrane transport pathway (evidence from literature and PharmGKB database—<https://www.pharmgkb.org/>); (B) Polymorphism was previously studied regarding its association with methotrexate therapeutic outcome in “low-dose” disease models (evidence from literature); (C) It was previously demonstrated the polymorphism has a functional impact in protein (evidence from literature); (D) Role of the protein in transporting folic acid that possibly has a role in transporting methotrexate; (E) Minor allele frequency adequate for the cohort size. ? Unknown for the European population.
